# Supplementary material
Source: PubMed Central journal article supplement (PMC5774027)
Supplement: NIHMS916195-supplement-1.pdf [file NIHMS916195-supplement-1.pdf]

**Supplemental Table 3. Mdr1-Anxiety Enrichment Factors across different ChEMBL datasets, Related to Figure 6**

| ChEMBL Version | Target ID  | Gene Name  | ADR     | EF     | P-value    | Q-value    |
|----------------|------------|------------|---------|--------|------------|------------|
| 17             | sp_P08183  | MDR1_HUMAN | Anxiety | 1.0303 | 1.7953E-09 | 2.1777E-06 |
| 18             | CHEMBL4302 | MDR1_HUMAN | Anxiety | 1.1159 | 4.5643E-09 | 4.9317E-06 |
| 19             | CHEMBL4302 | MDR1_HUMAN | Anxiety | 1.0663 | 0.00074254 | 0.52646    |
| 20             | CHEMBL4302 | MDR1_HUMAN | Anxiety | 1.0693 | 0.0038258  | 1.0        |
| 21             | CHEMBL4302 | MDR1_HUMAN | Anxiety | 1.0592 | 2.9247E-09 | 5.0012E-06 |

Enrichment factor scores for the Mdr1-Anxiety association across multiple versions of ChEMBL. Scores for Mdr1-Anxiety remain stable and significant across versions, indicating the enrichment is robust to different background comparisons as the ChEMBL database has grown over more than a year.
